# Supplementary material for: Anti-Helicobacter pylori Activity of a Lactobacillus sp. PW-7 Exopolysaccharide
Source: MDPI journal article supplement (doi:10.3390/foods10102453), 2021-10-14
Supplement: s1 [file s1]

# Anti-*Helicobacter pylori* Activity of a *Lactobacillus* sp. PW-7

## Exopolysaccharide

Jingfei Hu <sup>1,2</sup>, Xueqing Tian <sup>1,2</sup>, Tong Wei <sup>1,2</sup>, Hangjie Wu <sup>1,2</sup>, Jing Lu <sup>1,2</sup>, Mingsheng Lyu <sup>1,2</sup>  
and Shujun Wang <sup>1,2,\*</sup>

<sup>1</sup> Jiangsu Key Laboratory of Marine Bioresources and Environment, Jiangsu Key Laboratory of Marine Biotechnology, Jiangsu Ocean University, Lianyungang 222005, China; jfhu123@jou.edu.cn (J.H.); xqt@jou.edu.cn (X.T.); twei@jou.edu.cn (T.W.); wuhangjie@jou.edu.cn (H.W.); jinglu@jou.edu.cn (J.L.); mslyu@jou.edu.cn (M.L.)

<sup>2</sup> Co-Innovation Center of Jiangsu Marine Bio-Industry Technology, Jiangsu Ocean University, Lianyungang 222005, China

\* Correspondence: sjwang@jou.edu.cn

**Table S1.** Experiment on Removal of Hydrogen Peroxide from the Fermentation Supernatant of

Strain PW-7

| Indicator bacteria         | Treatment methods  | Diameter of bacteriostatic zone (mm) |
|----------------------------|--------------------|--------------------------------------|
| <i>Helicobacter pylori</i> | Unprocessed        | 14.530±0.154                         |
|                            | Catalase treatment | 14.463±0.395                         |

**Table S2.** Experiment on Removal of organic acid from the Fermentation Supernatant of Strain

PW-7

| Indicator bacteria         | Treatment methods | Diameter of bacteriostatic zone (mm) |
|----------------------------|-------------------|--------------------------------------|
| <i>Helicobacter pylori</i> | Unprocessed       | 14.653±0.969                         |
|                            | pH 7.0            | 13.14±0.355                          |

**Table S3.** Antibacterial spectrum of bacteriocin of strain PW-7

| Indicator bacteria             | Diameter of bacteriocin inhibition zone (mm) |
|--------------------------------|----------------------------------------------|
| <i>Helicobacter pylori</i>     | 7.843±0.131                                  |
| <i>Aeromonas salmonicida</i>   | 8.153±0.263                                  |
| <i>Aeromonas hydrophila</i>    | 8.060±0.337                                  |
| <i>Vibrio parahaemolyticus</i> | 7.253±0.188                                  |
| <i>Pseudomonas aeruginosa</i>  | 7.207±0.031                                  |
| <i>Escherichia coli</i>        | 7.127±0.261                                  |
| <i>Staphylococcus aureus</i>   | 7.077±0.142                                  |

*Bacillus subtilis*

6.550±0.348

---
